# Supplementary material for: Causes of Death in Patients with Severe Aortic Stenosis: An Observational study
Source: PubMed Central journal article supplement (PMC5676690; doi:10.1038/s41598-017-15316-6), 2017-11-07
Supplement: 41598_2017_15316_MOESM1_ESM.pdf [file 41598_2017_15316_MOESM1_ESM.pdf]

## Supplementary materials

### Causes of Death in Patients with Severe Aortic Stenosis:

#### An Observational study

**Authors:** Eri Minamino-Muta, MD<sup>1</sup>, Takao Kato, MD<sup>1</sup>; Takeshi Morimoto, MD, MPH<sup>2</sup>;  
Tomohiko Taniguchi, MD<sup>1</sup>; Hiroki Shiomi, MD<sup>1</sup>; Kenji Nakatsuma, MD<sup>1</sup>; Shinichi Shirai,  
MD<sup>3</sup>; Kenji Ando, MD<sup>3</sup>; Norio Kanamori, MD<sup>4</sup>; Koichiro Murata, MD<sup>5</sup>; Takeshi Kitai, MD<sup>6</sup>;  
Yuichi Kawase, MD<sup>7</sup>; Makoto Miyake, MD<sup>8</sup>; Chisato Izumi, MD<sup>8</sup>; Hirokazu Mitsuoka, MD<sup>9</sup>;  
Masashi Kato, MD<sup>10</sup>; Yutaka Hirano, MD<sup>11</sup>; Shintaro Matsuda, MD<sup>1</sup>; Kazuya Nagao, MD<sup>12</sup>;  
Tsukasa Inada, MD<sup>12</sup>; Tomoyuki Murakami, MD<sup>13</sup>; Yasuyo Takeuchi, MD<sup>14</sup>; Keiichiro  
Yamane, MD<sup>15</sup>; Mamoru Toyofuku, MD<sup>16</sup>; Mitsuru Ishii, MD<sup>17</sup>; Moriaki Inoko, MD<sup>18</sup>;  
Tomoyuki Ikeda, MD<sup>19</sup>; Akihiro Komasa, MD<sup>1</sup>; Eiji Tada, MD<sup>20</sup>; Katsuhisa Ishii, MD<sup>20</sup>; Kozo  
Hotta, MD<sup>21</sup>; Nobuya Higashitani, MD<sup>22</sup>; Toshikazu Jinnai, MD<sup>22</sup>; Yoshihiro Kato, MD<sup>23</sup>;  
Yasutaka Inuzuka, MD<sup>24</sup>; Chiyo Maeda, MD<sup>25</sup>; Yuko Morikami, MD<sup>26</sup>; Naritatsu Saito, MD<sup>1</sup>;  
Ryuzo Sakata, MD<sup>27</sup>; Kenji Minatoya, MD<sup>28</sup>; Takeshi Kimura, MD<sup>1</sup>.

**Supplementary material content****Supplementary Tables****Page 3-7****Supplementary Figures****Page 8-9****List of investigators****Page 10-12**

## **Supplementary Tables**

**Supplementary Table 1.** Classifications of causes of death into cardiac and non-cardiac categories

**Supplementary Table 2.** Baseline clinical and echocardiographic characteristics

**Supplemental Table 1. Classifications of causes of death into cardiac and non-cardiac categories**

---

**Cardiac death**

Any of the following criteria

Death due to acute myocardial infarction, heart failure, and other cardiac cause (e.g. tamponade)

All aortic valve procedure-related death, including directly related to the procedure or complications during hospitalization after AVR/TAVI

Sudden or unwitnessed death

Death of unknown cause in which cardiac cause could not be excluded

**Non-cardiac death**

Death caused by non-coronary vascular disease such as cerebrovascular disease, peripheral arterial disease, dissecting aneurysm, or other vascular disease

Other non-cardiac deaths were sub-classified into the following categories: malignancy, accidental, infection/sepsis, respiratory failure, renal failure, hepatic failure, or other (e.g. senility, hemorrhage, suicide)

---

AVR=aortic valve replacement, TAVI=transcatheter aortic valve implantation

**Supplementary Table 2. Baseline clinical and echocardiographic characteristics**

| <b>Variable</b>                                | <b>All patients (N=3815)</b> |
|------------------------------------------------|------------------------------|
| <b>Clinical characteristics</b>                |                              |
| Age, mean (SD), years *                        | 77.8 (9.8)                   |
| Age ≥80 years, No. (%)                         | 1729 (45)                    |
| Male, No. (%) *                                | 1443 (38)                    |
| BMI, mean (SD)                                 | 21.8 (3.8)                   |
| BMI <22, No. (%),    *                         | 2326 (61)                    |
| BSA, mean (SD), m <sup>2</sup>                 | 1.46 (0.18)                  |
| Initial AVR cohort, No. (%)                    | 1197 (31)                    |
| Hypertension, No. (%) *                        | 2667 (70)                    |
| Current smoking, No. (%) *                     | 196 (5.1)                    |
| History of smoking, No. (%)                    | 830 (22)                     |
| Dyslipidemia, No. (%), †                       | 1327 (35)                    |
| On statin therapy, No. (%)                     | 970 (25)                     |
| Diabetes mellitus, No. (%)                     | 897 (24)                     |
| On insulin therapy, No. (%) *                  | 188 (4.9)                    |
| Coronary artery disease, No. (%) *             | 1144 (30)                    |
| Prior myocardial infarction, No. (%) *         | 323 (8.5)                    |
| Prior PCI, No. (%)                             | 502 (13)                     |
| Prior CABG, No. (%)                            | 199 (5.2)                    |
| Prior symptomatic stroke, No. (%) *            | 503 (13)                     |
| Atrial fibrillation or flutter, No. (%) *      | 828 (22)                     |
| Aortic/peripheral vascular disease, No. (%) *  | 282 (7.4)                    |
| Serum creatinine, median (IQR), mg/dL *        | 0.9 (0.7-1.26)               |
| Dialysis *                                     | 405 (11)                     |
| Anemia, No. (%),§ *                            | 2117 (55)                    |
| Hemoglobin (IQR), g/dl                         | 11.6 (10.2-13)               |
| Liver cirrhosis (Child–Pugh B or C), No. (%) * | 38 (1.0)                     |
| Malignancy, No. (%)                            | 517 (14)                     |
| Malignancy currently under treatment *         | 149 (3.9)                    |
| Recurrence of malignancy, No. (%)              | 58 (1.5)                     |
| Chest wall irradiation, No. (%)                | 25 (0.7)                     |
| Immunosuppressive therapy, No. (%)             | 131 (3.4)                    |
| Chronic lung disease, No. (%)                  | 400 (10)                     |
| Chronic lung disease (moderate or severe) *    | 112 (2.9)                    |

|                                                                 |                 |
|-----------------------------------------------------------------|-----------------|
| Logistic EuroSCORE, median (IQR), %                             | 9.7 (5.8-16.7)  |
| EuroSCORE II, median (IQR), %                                   | 2.9 (1.62-4.82) |
| STS score (PROM), median (IQR), %                               | 3.8 (2.2-6.5)   |
| Symptoms at index echocardiography, No. (%)                     | 2005 (53)       |
| Chest pain                                                      | 498 (13)        |
| Syncope                                                         | 198 (5.2)       |
| Chronic exertional dyspnea                                      | 1603 (42)       |
| Admission for heart failure at index echocardiography, No. (%)* | 790 (21)        |
| Etiology of aortic stenosis, No. (%)                            |                 |
| Degenerative                                                    | 3379 (89)       |
| Congenital (Unicuspid, Bicuspid, or Quadricuspid)               | 258 (6.8)       |
| Rheumatic                                                       | 150 (3.9)       |
| Infective endocarditis                                          | 7 (0.2)         |
| Others                                                          | 21 (0.6)        |
| <b>Echocardiographic variables</b>                              |                 |
| V <sub>max</sub> , mean (SD), m/s                               | 4.1 (0.9)       |
| V <sub>max</sub> ≥4m/s, No. (%) *                               | 2185 (57)       |
| Peak aortic PG, mean (SD), mmHg                                 | 71.8 (31.6)     |
| Mean aortic PG, mean (SD), mmHg                                 | 40.8 (19.7)     |
| AVA (equation of continuity), mean (SD), cm <sup>2</sup>        | 0.72 (0.18)     |
| AVA index, mean (SD), cm <sup>2</sup> /m <sup>2</sup>           | 0.50 (0.13)     |
| LV end-diastolic diameter, mean (SD), mm                        | 45.9 (7.0)      |
| LV end-systolic diameter, mean (SD), mm                         | 30.2 (7.9)      |
| LVEF, mean (SD), %                                              | 62.8 (13.5)     |
| LVEF <68%, No. (%) *                                            | 2242 (59)       |
| IVST in diastole, mean (SD), mm                                 | 11.3 (2.3)      |
| PWT in diastole, mean (SD), mm                                  | 11.0 (2.0)      |
| ny combined valvular disease (moderate or severe), No. (%) *    | 1558 (41)       |
| Moderate or severe AR                                           | 791 (21)        |
| Moderate or severe MS                                           | 133 (3.5)       |
| Moderate or severe MR                                           | 763 (20)        |
| Moderate or severe TR                                           | 628 (16)        |
| TR pressure gradient ≥40 mmHg, No. (%) *                        | 606 (16)        |

\* Variables selected for cause-specific Cox proportional hazard models.

|| Body mass index was calculated as weight in kilograms divided by height in meters squared.

† Dyslipidemia was defined as total cholesterol levels ≥240 mg/dL, high-density lipoprotein

cholesterol levels <40 g/dL, or the use of statin

§ Anemia was defined by the World Health Organization criteria (hemoglobin <12.0 g/dL in women and <13.0 g/dL in men).

AR=aortic regurgitation, AVA=aortic valve area, AVR=aortic valve replacement, BMI=body mass index, BSA=body surface area, CABG=coronary artery bypass grafting, ESRD=end-stage renal disease, IQR=interquartile range, IVST=interventricular septal wall thickness, LV=left ventricular, LVEF=left ventricular ejection fraction, MR=mitral regurgitation, MS=mitral stenosis, PCI=percutaneous coronary intervention, PG=pressure gradient, PROM=predicted risk of mortality, PWT=posterior wall thickness, SD=standard deviation, and STS=Society of Thoracic Surgeons, TR=tricuspid regurgitation, and Vmax=peak aortic jet velocity

**Supplementary figure legend****Supplementary Figure 1.** Causes of death according to management strategy

AVR=aortic valve replacement, CD=cardiac death, and NCD=non-cardiac death



Supplementary Figure 1.

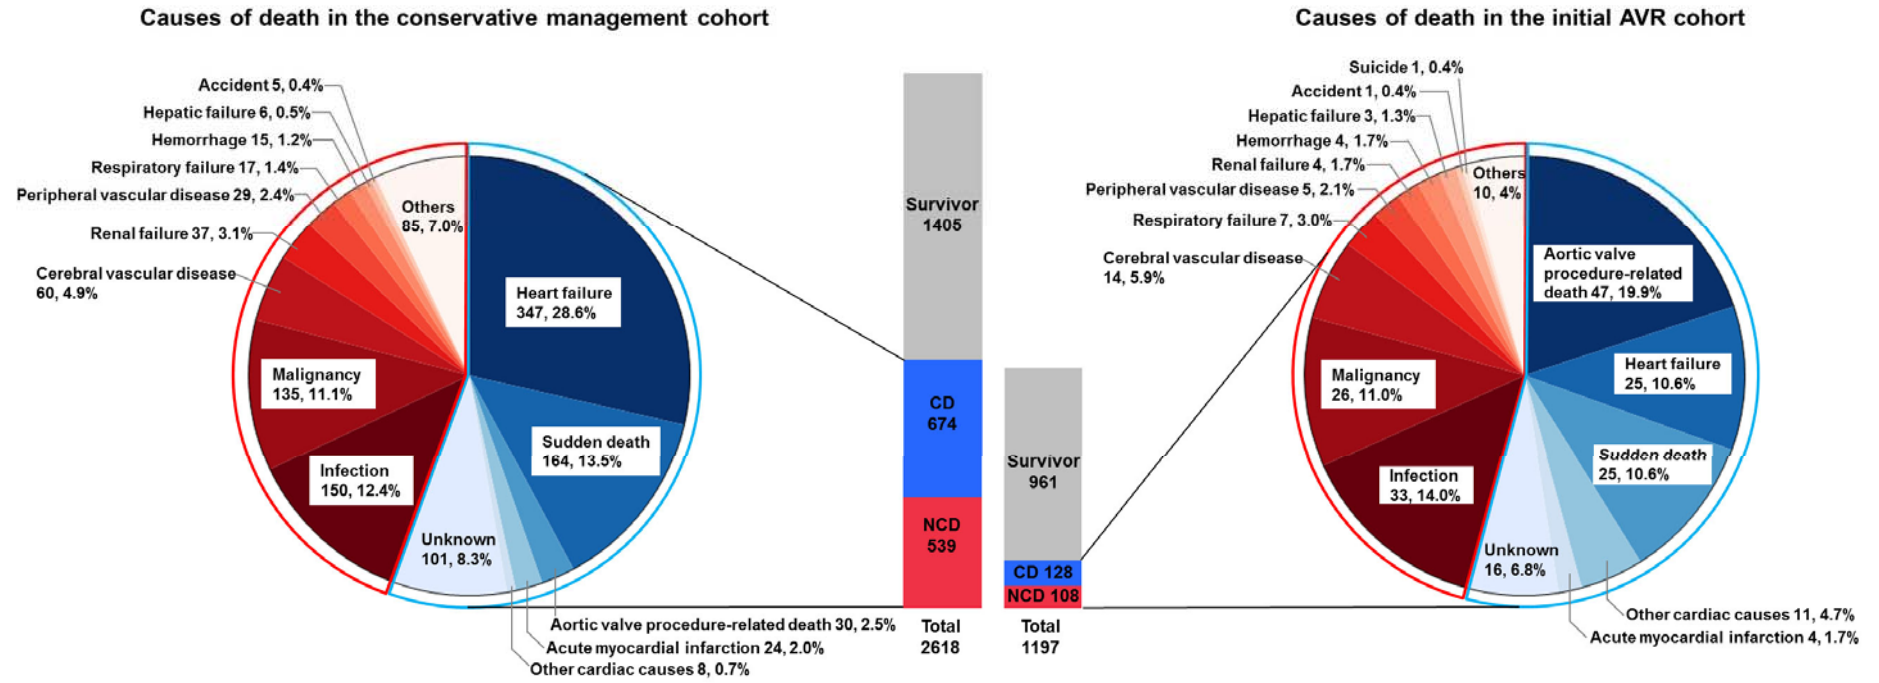

## List of Investigators

### Principal Investigators

Takeshi Kimura, Department of Cardiovascular Medicine, Kyoto University Graduate School of Medicine, Kyoto, Japan

Ryuzo Sakata, Department of Cardiovascular Surgery, Kyoto University Graduate School of Medicine, Kyoto, Japan

### List of participating centers and investigators for the CURRENT AS registry

#### Cardiology

##### **Department of Cardiovascular Medicine, Kyoto University Graduate School of**

**Medicine:** Takeshi Kimura, Tomohiko Taniguchi, Hiroki Shiomi, Naritatsu Saito, Masao Imai, Junichi Tazaki, Toshiaki Toyota, Hirooki Higami, Tetsuma Kawaji

**Department of Cardiology, Kokura Memorial Hospital:** Kenji Ando, Shinichi Shirai, Kengo Kourai, Takeshi Arita, Shiro Miura, Kyohei Yamaji

**Division of Cardiology, Shimada Municipal Hospital:** Takeshi Aoyama, Norio Kanamori

**Department of Cardiology, Shizuoka City Shizuoka Hospital:** Tomoya Onodera, Koichiro Murata

**Department of Cardiovascular Medicine, Kobe City Medical Center General Hospital:** Yutaka Furukawa, Takeshi Kitai, Kitae Kim

**Department of Cardiovascular Medicine, Kurashiki Central Hospital:** Kazushige Kadota, Yuichi Kawase, Keiichiro Iwasaki, Hiroshi Miyawaki, Ayumi Misao, Akimune Kuwayama, Masanobu Ohya, Takenobu Shimada, Hidewo Amano

**Department of Cardiology, Tenri Hospital:** Yoshihisa Nakagawa, Chisato Izumi, Makoto Miyake, Masashi Amano, Yusuke Takahashi, Yusuke Yoshikawa, Shunsuke Nishimura, Maiko Kuroda

**Division of Cardiology, Nara Hospital, Kinki University Faculty of Medicine:** Manabu Shirotani, Hirokazu Mitsuoka

**Department of Cardiology, Mitsubishi Kyoto Hospital:** Shinji Miki, Tetsu Mizoguchi, Masashi Kato, Takafumi Yokomatsu, Akihiro Kushiyama, Hidenori Yaku, Toshimitsu Watanabe

**Department of Cardiology, Kinki University Hospital:** Shunichi Miyazaki, Yutaka Hirano

**Department of Cardiology, Kishiwada City Hospital:** Mitsuo Matsuda, Shintaro Matsuda, Sachiko Sugioka

**Department of Cardiovascular Center, Osaka Red Cross Hospital:** Tsukasa Inada, Kazuya Nagao, Naoki Takahashi, Kohei Fukuchi

**Department of Cardiology, Koto Memorial Hospital:** Tomoyuki Murakami, Hiroshi Mabuchi, Teruki Takeda, Tomoko Sakaguchi, Keiko Maeda, Masayuki Yamaji, Motoyoshi

Maenaka, Yutaka Tadano

**Department of Cardiology, Shizuoka General Hospital:** Hiroki Sakamoto, Yasuyo Takeuchi, Makoto Motooka, Ryusuke Nishikawa

**Department of Cardiology, Nishikobe Medical Center:** Hiroshi Eizawa, Keiichiro Yamane, Mitsunori Kawato, Minako Kinoshita, Kenji Aida

**Department of Cardiology, Japanese Red Cross Wakayama Medical Center:** Takashi Tamura, Mamoru Toyofuku, Kousuke Takahashi, Euihong Ko

**Department of Cardiology, National Hospital Organization Kyoto Medical Center:** Masaharu Akao, Mitsuru Ishii, Nobutoyo Masunaga, Hisashi Ogawa, Moritake Iguchi, Takashi Unoki, Kensuke Takabayashi, Yasuhiro Hamatani, Yugo Yamashita

**Cardiovascular Center, The Tazuke Kofukai Medical Research Institute, Kitano Hospital:** Moriaki Inoko, Eri Minamino-Muta, Takao Kato

**Department of Cardiology, Hikone Municipal Hospital:** Yoshihiro Himura, Tomoyuki Ikeda

**Department of Cardiology, Kansai Electric Power Hospital:** Katsuhisa Ishii, Akihiro Komasa

**Department of Cardiology, Hyogo Prefectural Amagasaki General Medical Center:** Yukihiro Sato, Kozo Hotta, Shuhei Tsuji

**Department of Cardiology, Rakuwakai Otowa Hospital:** Yuji Hiraoka, Nobuya Higashitani

**Department of Cardiology, Saiseikai Noe Hospital:** Ichiro Kouchi, Yoshihiro Kato

**Department of Cardiology, Shiga Medical Center for Adults:** Shigeru Ikeguchi, Yasutaka Inuzuka, Soji Nishio, Jyunya Seki

**Department of Cardiology, Hamamatsu Rosai Hospital:** Eiji Shinoda, Miho Yamada, Akira Kawamoto, Chiyo Maeda

**Department of Cardiology, Japanese Red Cross Otsu Hospital:** Takashi Konishi, Toshikazu Jinnai, Kouji Sogabe, Michiya Tachiiri, Yukiko Matsumura, Chihiro Ota

**Department of Cardiology, Hirakata Kohsai Hospital:** Shoji Kitaguchi, Yuko Morikami

### **Cardiovascular Surgery**

**Department of Cardiovascular Surgery, Kyoto University Graduate School of Medicine:** Ryuzo Sakata, Kenji Minakata

**Department of Cardiovascular Surgery, Kokura Memorial Hospital:** Michiya Hanyu

**Department of Cardiovascular Surgery, Shizuoka City Shizuoka Hospital:** Fumio Yamazaki

**Department of Cardiovascular Surgery, Kobe City Medical Center General Hospital:** Tadaaki Koyama

**Department of Cardiovascular Surgery, Kurashiki Central Hospital:** Tatsuhiko Komiya

**Department of Cardiovascular Surgery, Tenri Hospital:** Kazuo Yamanaka

**Department of Cardiovascular Surgery, Nara Hospital, Kinki University Faculty of Medicine:** Noboru Nishiwaki

**Department of Cardiovascular Surgery, Mitsubishi Kyoto Hospital:** Hiroyuki Nakajima, Motoaki Ohnaka, Hiroaki Osada, Katsuaki Meshii

**Department of Cardiovascular Surgery, Kinki University Hospital:** Toshihiko Saga

**Department of Cardiovascular Surgery, Kishiwada City Hospital:** Masahiko Onoe

**Department of Cardiovascular Surgery, Osaka Red Cross Hospital:** Shogo Nakayama

**Department of Cardiovascular Surgery, Shizuoka General Hospital:** Genichi Sakaguchi

**Department of Cardiovascular Surgery, Japanese Red Cross Wakayama Medical Center:** Atsushi Iwakura

**Department of Cardiovascular Surgery, National Hospital Organization Kyoto Medical Center:** Kotaro Shiraga

**Department of Cardiovascular Surgery, Cardiovascular Center, The Tazuke Kofukai Medical Research Institute, Kitano Hospital:** Koji Ueyama

**Department of Cardiovascular Surgery, Hyogo Prefectural Amagasaki General Medical Center:** Keiichi Fujiwara

**Department of Cardiovascular Surgery, Rakuwakai Otowa Hospital:** Atsushi Fukumoto

**Department of Cardiovascular Surgery, Shiga Medical Center for Adults:** Senri Miwa

**Department of Cardiovascular Surgery, Hamamatsu Rosai Hospital:** Junichiro Nishizawa

**Department of Cardiovascular Surgery, Japanese Red Cross Otsu Hospital:** Mitsuru Kitano

#### **A clinical event committee**

Hirotooshi Watanabe, MD (Kyoto University Graduate School of Medicine); Kenji Nakatsuma, MD (Kyoto University Graduate School of Medicine), Tomoki Sasa, MD (Kishiwada City Hospital)
